# Supplementary material for: Photoluminescence of the first examples of metal–organic frameworks with two novel tetrazolatephenyl acetic acid derivatives: an experimental and theoretical study
Source: Royal Society of Chemistry journal article supplement (doi:10.1039/c4ce00662c), 2014-01-01

## ESI

# Photoluminescence of the First Examples of Metal-Organic-Frameworks with Two Novel Tetrazolatephenyl Acetic Acid Derivatives. An Experimental and Theoretical Study.

Antonio J. Calahorro,<sup>a</sup> Piero Macchi,<sup>b,\*</sup> Alfonso Salinas-Castillo,<sup>c</sup> Eider San Sebastián,<sup>c</sup> José M. Seco<sup>c</sup> and Antonio Rodríguez-Diéguez<sup>a,\*</sup>

Index:

1. Different rings formed in the structures.
2. Crystallographic Tables.
3. XRPD Analysis of 1 and 2.
4. TG measurements.
5. TDDFT calculation results for free ligands.

### 1. Different rings formed in the structures.

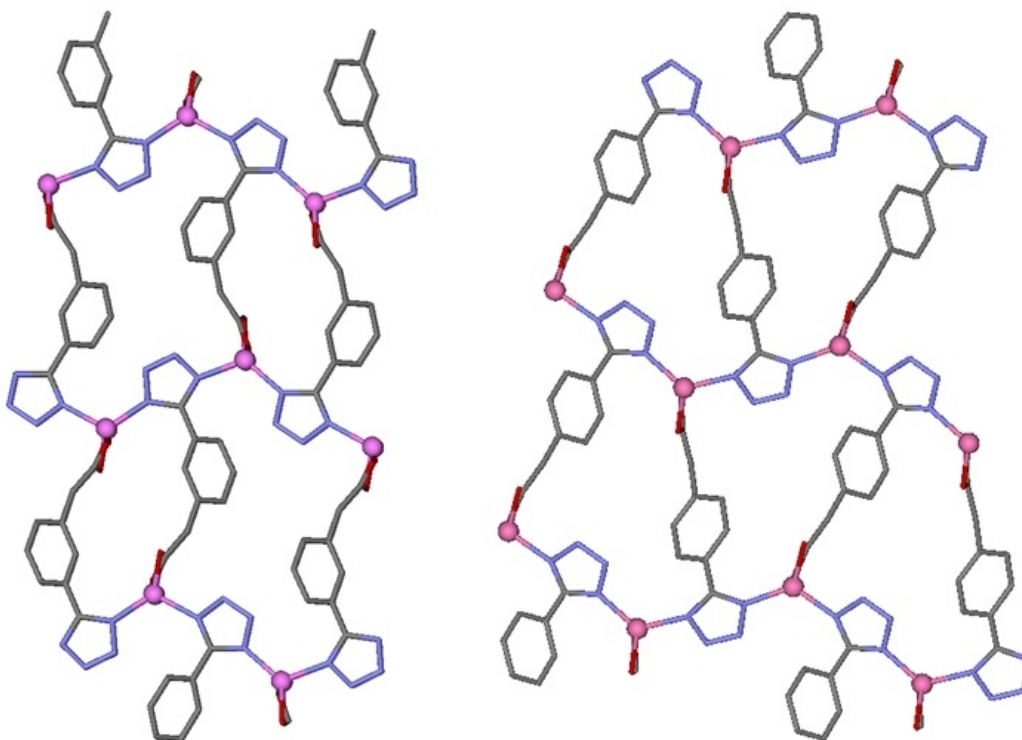

Figure S1. A view of the rings formed in the structures for **1** (left) and **2** (right), respectively.

## 2. Crystallographic Tables

Table S1. Bond distances (Å)

| 1               | 2               |
|-----------------|-----------------|
| N1 Zn1 2.001(3) | N1 Zn1 1.991(5) |
| N2 N3 1.287(4)  | N2 N3 1.285(5)  |
| N3 N4 1.348(4)  | N3 N4 1.352(6)  |
| N4 Zn1 1.965(3) | N4 Zn1 1.973(6) |
| O1 Zn1 1.972(3) | O1 Zn1 1.965(2) |
| O2 Zn1 1.962(3) | O2 Zn1 1.976(2) |
| Zn1 O2 1.962(3) | Zn1 O1 1.965(2) |
| Zn1 N4 1.965(3) | Zn1 O2 1.976(2) |
| Zn1 O1 1.972(3) | Zn1 N1 1.991(5) |

Table S2. Bond angles (°)

| 1                    | 2                    |
|----------------------|----------------------|
| O2 Zn1 N4 118.94(12) | O1 Zn1 N4 113.3(2)   |
| O2 Zn1 O1 107.75(11) | O1 Zn1 O2 108.13(10) |
| N4 Zn1 O1 106.09(11) | N4 Zn1 O2 104.7(2)   |
| O2 Zn1 N1 101.73(11) | O1 Zn1 N1 103.0(2)   |
| N4 Zn1 N1 116.27(12) | N4 Zn1 N1 123.37(15) |
| O1 Zn1 N1 105.10(13) | O2 Zn1 N1 103.2(2)   |

## 3. XRPD Analysis of 1 and 2.

The powders were gently ground in an agate mortar and then deposited with care in the hollow of an aluminum holder equipped with a zero background plate. Diffraction data ( $\text{CuK}\alpha$ ,  $\lambda=1.5418 \text{ \AA}$ ) were collected on a  $\theta:\theta$  Bruker AXS D8 vertical scan diffractometer equipped with primary and secondary Soller slits, a secondary beam curved graphite monochromator, a Na(Tl)I scintillation detector, and pulse height amplifier discrimination. The generator was operated at 40 kV and 40 mA. Optics used are the following: divergence  $0.5^\circ$ , antiscatter  $0.5^\circ$ , receiving 0.2 mm. A short scan was performed with  $5 < 2\theta < 25^\circ$ . LeBail refinements was obtained with technique implemented in Topas-13. [Topas-R, Bruker AXS: General profile and structure analysis software for powder diffraction data.]

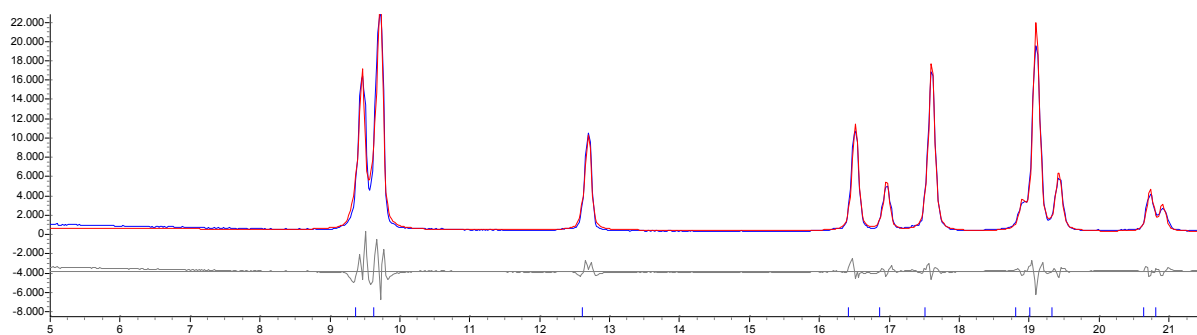

Figure S2. LeBail Refinement in **1**.  $a = 10.5058 \text{ \AA}$ ,  $b = 18.8568 \text{ \AA}$ ,  $c = 4.8160 \text{ \AA}$ ,  $V = 954.095 \text{ \AA}^3$ , Simple Axial Model = 8 mm (Fixed) and Sample displacement = -0.189 mm.

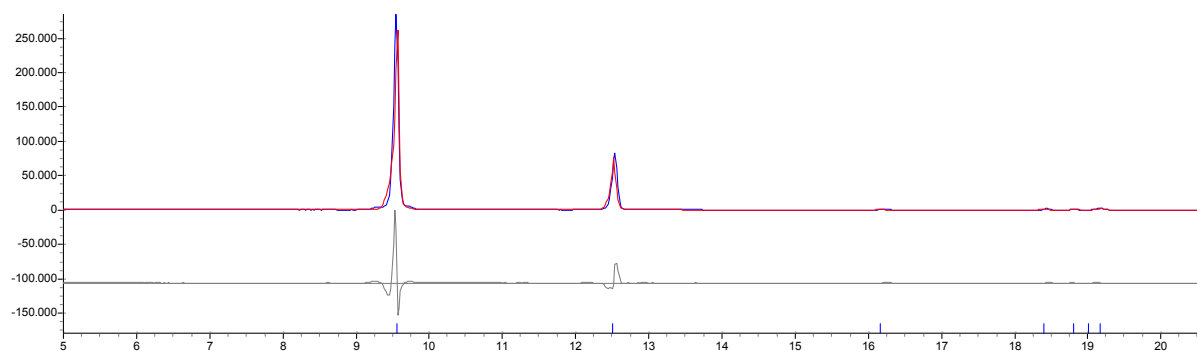

Figure S3. LeBail Refinement in **2**.  $a = 18.5777 \text{ \AA}$ ,  $b = 4.7873 \text{ \AA}$ ,  $c = 10.9274 \text{ \AA}$ ,  $V = 971.864 \text{ \AA}^3$ , Simple Axial Model = 8 mm (Fixed) and Sample displacement = -0.03 mm.

#### 4. TG measurements.

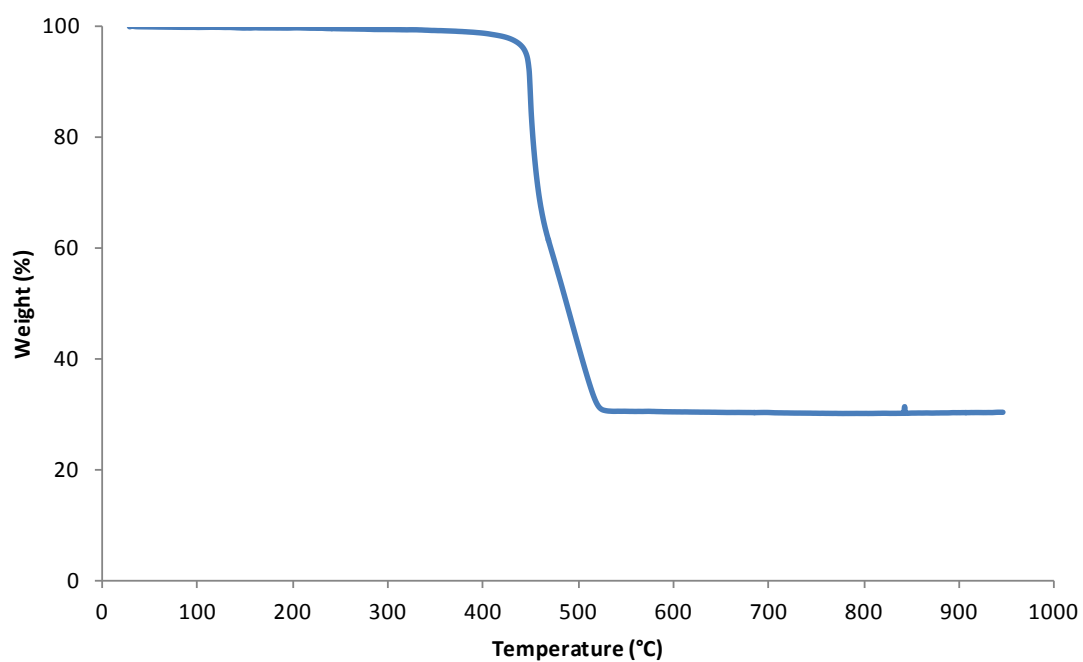

Figure S4. TG corresponding to **1**.

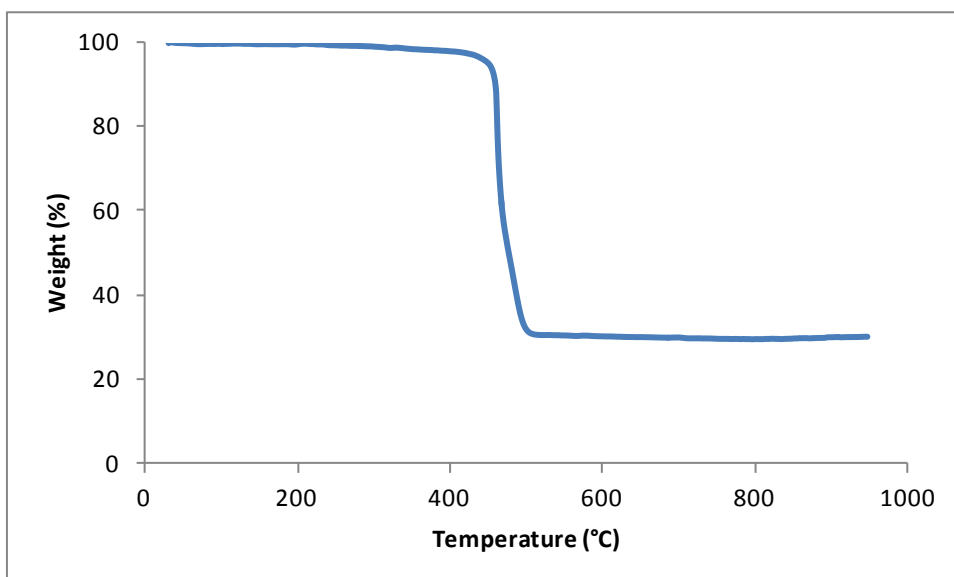

Figure S5. TG corresponding to **2**.

## 5. TDDFT calculation results for free ligands.

**Table S3.** Calculated emission maxima and corresponding transitions for free ligands 1,3-tzbaa<sup>-2</sup> and 1,4-tzbaa<sup>-2</sup>

|                         | Calc. Emis (nm) | Cal. Transitions | Exp. Emis (nm) |
|-------------------------|-----------------|------------------|----------------|
| 1,3-tzbaa <sup>-2</sup> | 424             | HOMO ← LUMO      | -              |
| 1,4-tzbaa <sup>-2</sup> | 352             | HOMO ← LUMO-1    | -              |
|                         | 502             | HOMO ← LUMO      | -              |

**Figure S6.** Calculated emission spectra of free ligands 1,3-tzbaa<sup>-2</sup> and 1,4-tzbaa<sup>-2</sup>

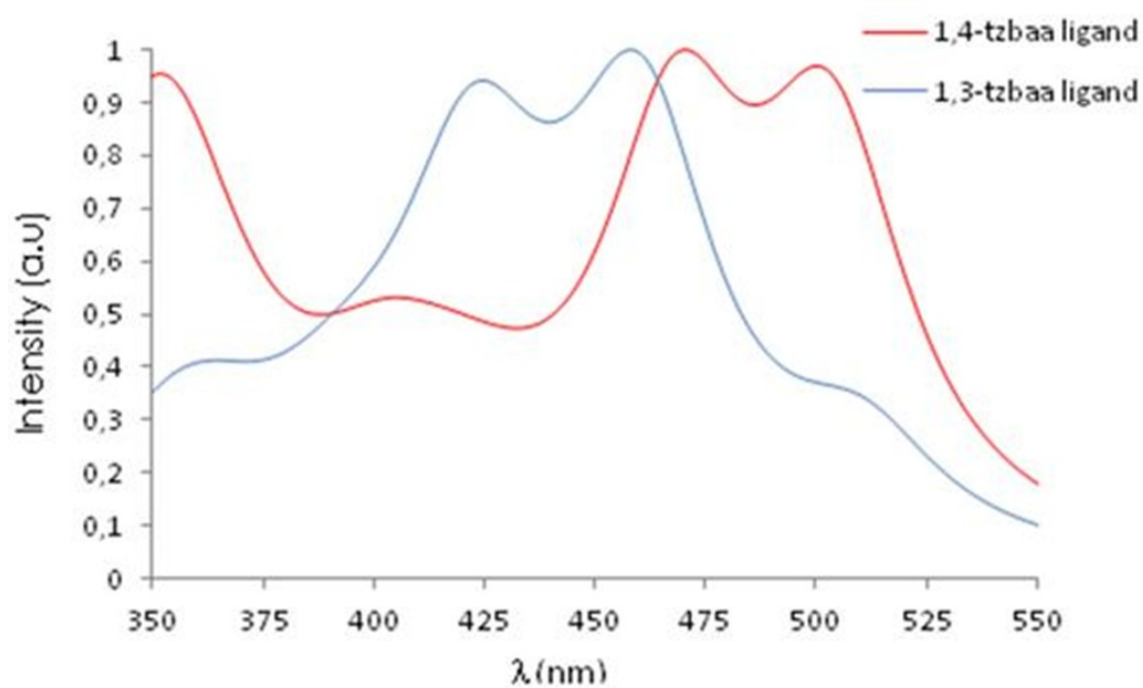

Supplement: c4ce00662c1.pdf [file c4ce00662c1.pdf]
